# Supplementary material for: Probing luminescent Fe-doped ZnO nanowires for high-performance oxygen gas sensing application
Source: Royal Society of Chemistry journal article supplement (doi:10.1039/c4ra08586h), 2014-01-01
Supplement: c4ra08586h1.pdf [file c4ra08586h1.pdf]

†Electronic Supplementary Information(ESI)

**Probing luminescent Fe-doped ZnO nanowires for high-performance oxygen gas sensing application†**

5 **Rishi Vyas<sup>a, b,\*</sup>, Pawan Kumar<sup>c</sup>, Jaya Dwivedi<sup>c</sup>, Sarla Sharma<sup>d</sup>, Shabana Khan<sup>e</sup>, R. Divakar<sup>f</sup>,  
Avneesh Anshul<sup>c,g</sup>, K. Sachdev<sup>b</sup>, S. K. Sharma<sup>a</sup>, Bipin Kumar Gupta<sup>c,\*</sup>**

<sup>a</sup> Department of Physics, School of Basic Sciences, Jaipur National University, Jaipur- 302017 (INDIA)

<sup>b</sup>Department of Physics, Malaviya National Institute of Technology, Jaipur-302017 (INDIA)

<sup>c</sup>CSIR-National Physical Laboratory (CSIR) Dr K S Krishnan Road, New Delhi 110012 (INDIA)

10 <sup>d</sup>Department of Physics, JaganNath Gupta Institute of Engineering and Technology, Jaipur-302022 (INDIA)

<sup>e</sup>Mechanical Metallurgy Division, Bhabha Atomic Research Centre, Mumbai 400085 (INDIA)

<sup>f</sup>Physical Metallurgy Group (MMG), Indira Gandhi Centre for Atomic Research, Kalpakkam-603102 (INDIA)

<sup>g</sup>CSIR -Advanced Materials and Process Institute, Bopal, 462026 (INDIA).

15 **\*Corresponding authors Email: [mail2rishivyas@gmail.com](mailto:mail2rishivyas@gmail.com)(R.V.) and [bipinbhu@yahoo.com](mailto:bipinbhu@yahoo.com) (B.K.G)**

20

25

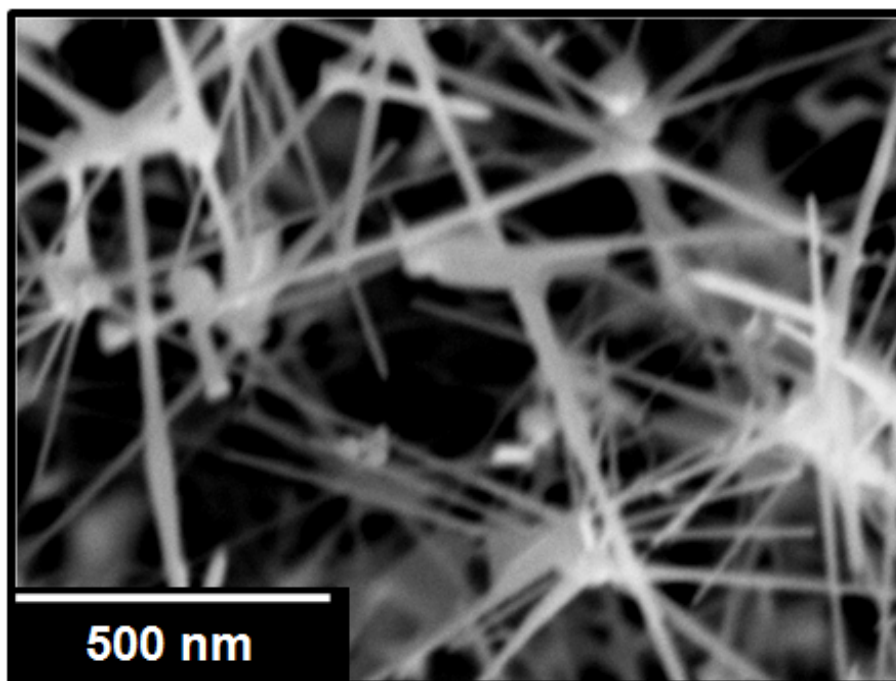

30 **Fig. S1** The magnified view of the surface morphology of 9 wt % Fe-doped ZnO nanowires based film which is shown in Scheme 1c.

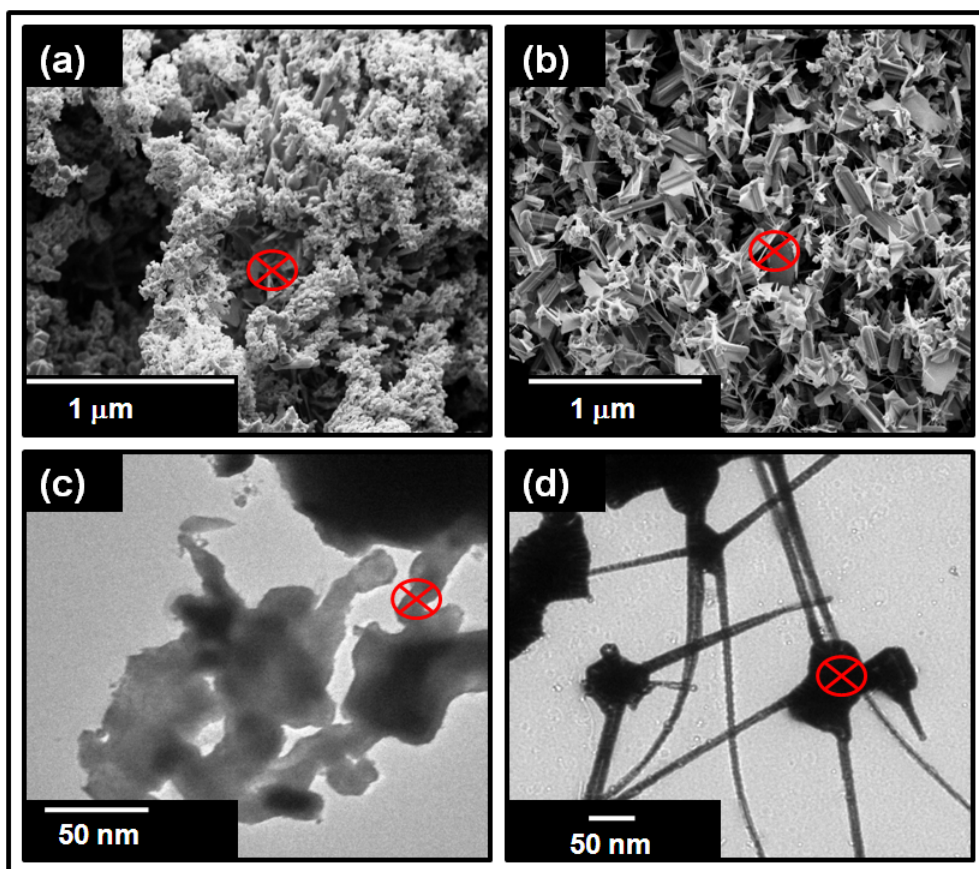

**Fig. S2** (a &b) represent the SEM images of 1wt% and 10 wt% Fe-doped ZnO nanowires respectively. (c &d) represent the TEM images of 1wt% and 10 wt% Fe-doped ZnO nanowires respectively. It can be easily noticed from micrographs (a & c) that 1 wt% Fe-doped ZnO nanowires shows the under growth morphology of Fe-doped ZnO nanowires which is marked by red cross circle and (b & d) 10 wt% Fe-doped ZnO nanowires exhibits the cluster formation of unconsumed Fe during nanowire growth process.

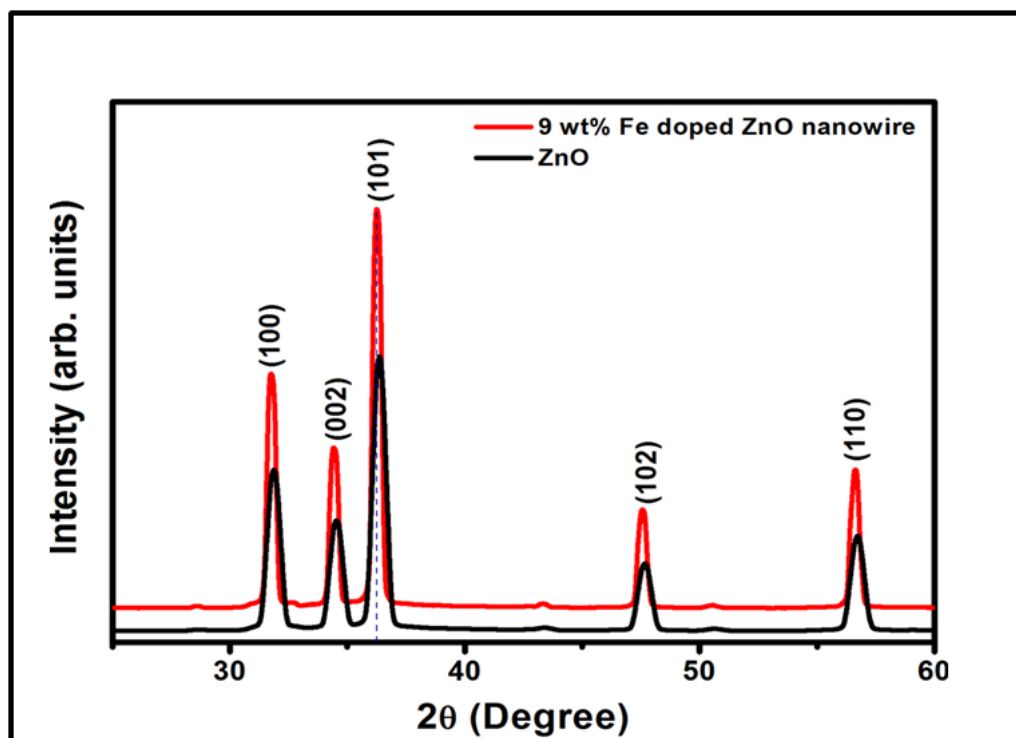

Fig. S3 XRD patterns of undoped and 9 wt% Fe-doped ZnO nanowires.

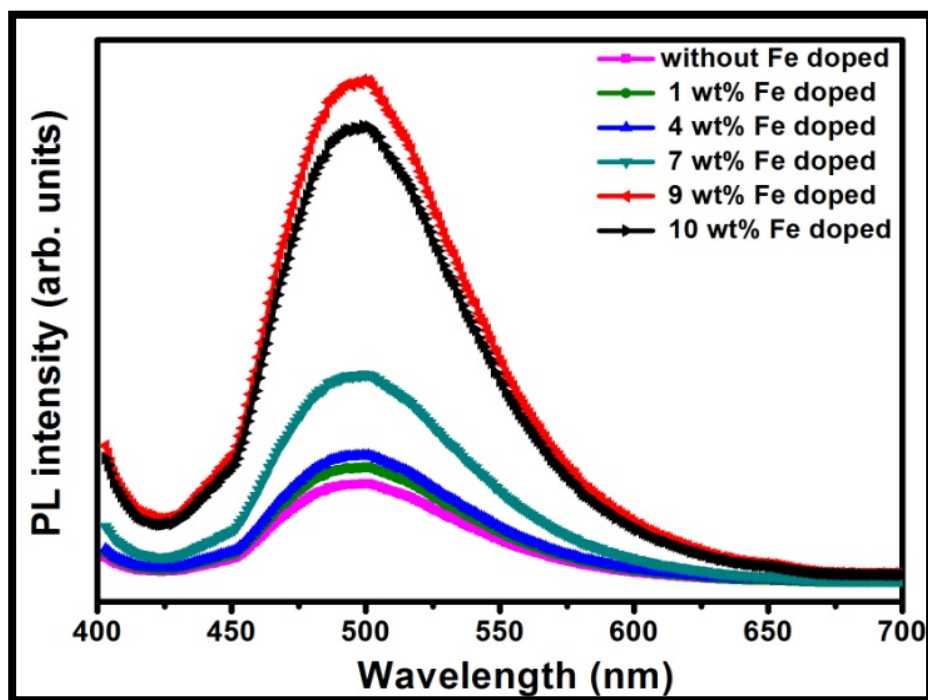

**Fig. S4** PL spectra of different concentration (0, 1, 4, 7, 9 and 10 wt%) of Fe doped ZnO nanowires.

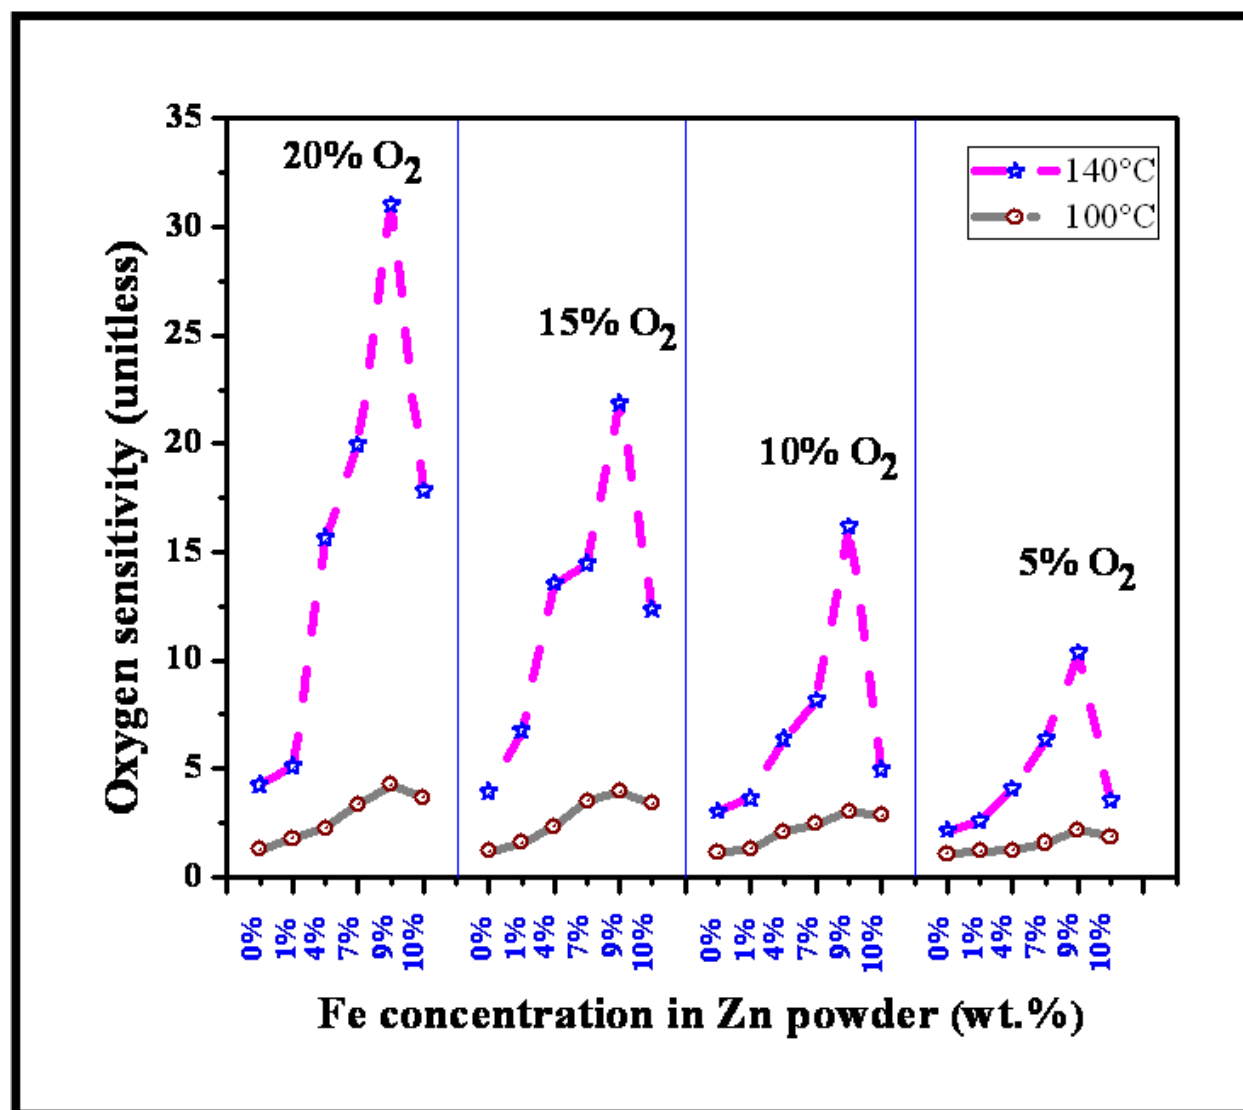

**Fig. S5** Oxygen sensing performance of different concentration (0, 1, 4, 7, 9 and 10 wt%) of Fe-doped ZnO nanowire under different ambient condition of oxygen concentration.

**Table TS1** Summary of gas sensing performance of undoped and 9 wt% Fe-doped ZnO nanowires.

| ZnO-Nanowire           | Operating Temperature (100°C) | Operating Temperature (140°C) |
|------------------------|-------------------------------|-------------------------------|
| Sensitivity (Unitless) | 1.26                          | 4.27                          |
| Response Time (Sec)    | 81                            | 12                            |
| Recovery Time (Sec)    | 74                            | 19                            |
| Fe-doped ZnO-Nanowire  | Operating Temperature (100°C) | Operating Temperature (140°C) |
| Sensitivity (Unitless) | 23                            | 31                            |
| Response Time (Sec)    | 38                            | 11                            |
| Recovery Time (Sec)    | 46                            | 11                            |
